# Supplementary material
Source: PubMed Central journal article supplement (PMC3680739)

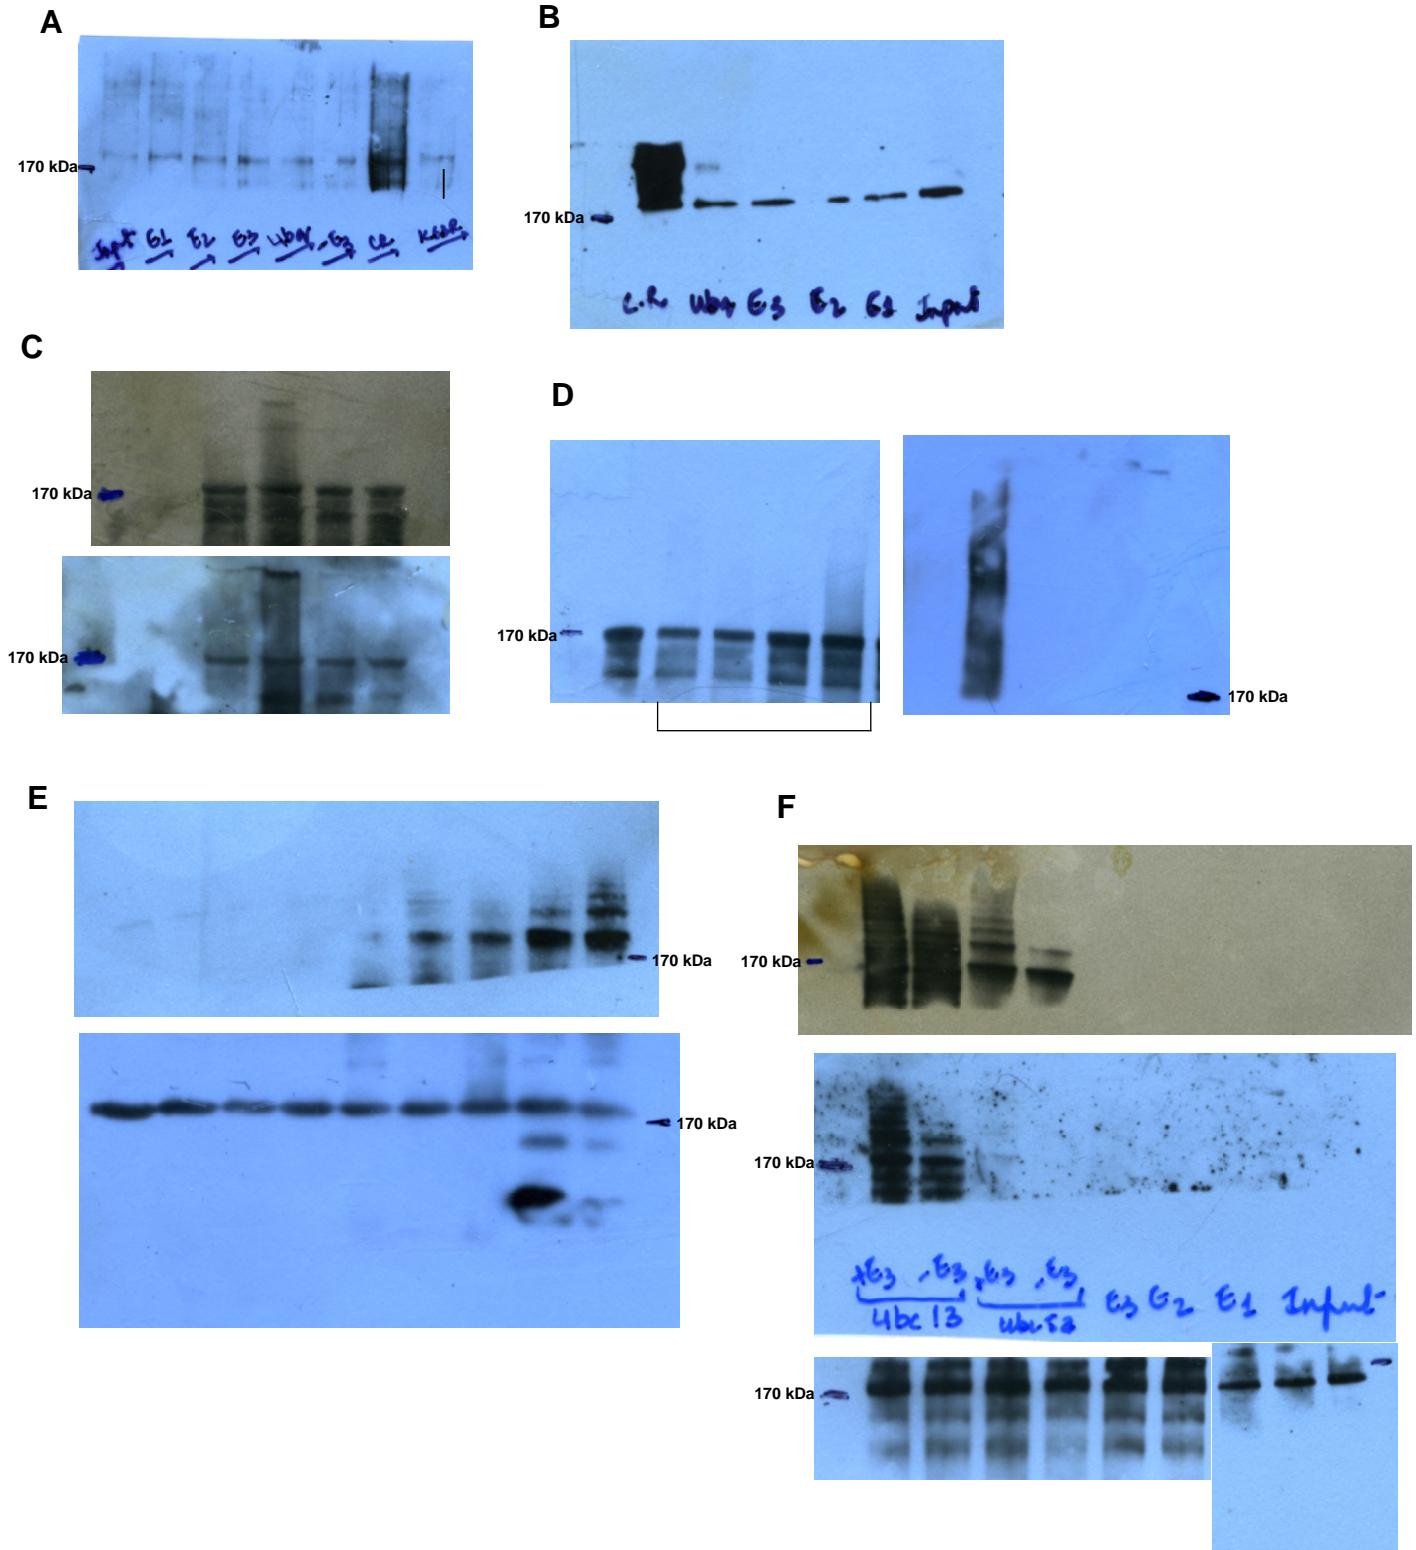

Supplement: emboj2013117df2.pdf [file emboj2013117df2.pdf]

Source file Figure 3  
Tikoo et al.

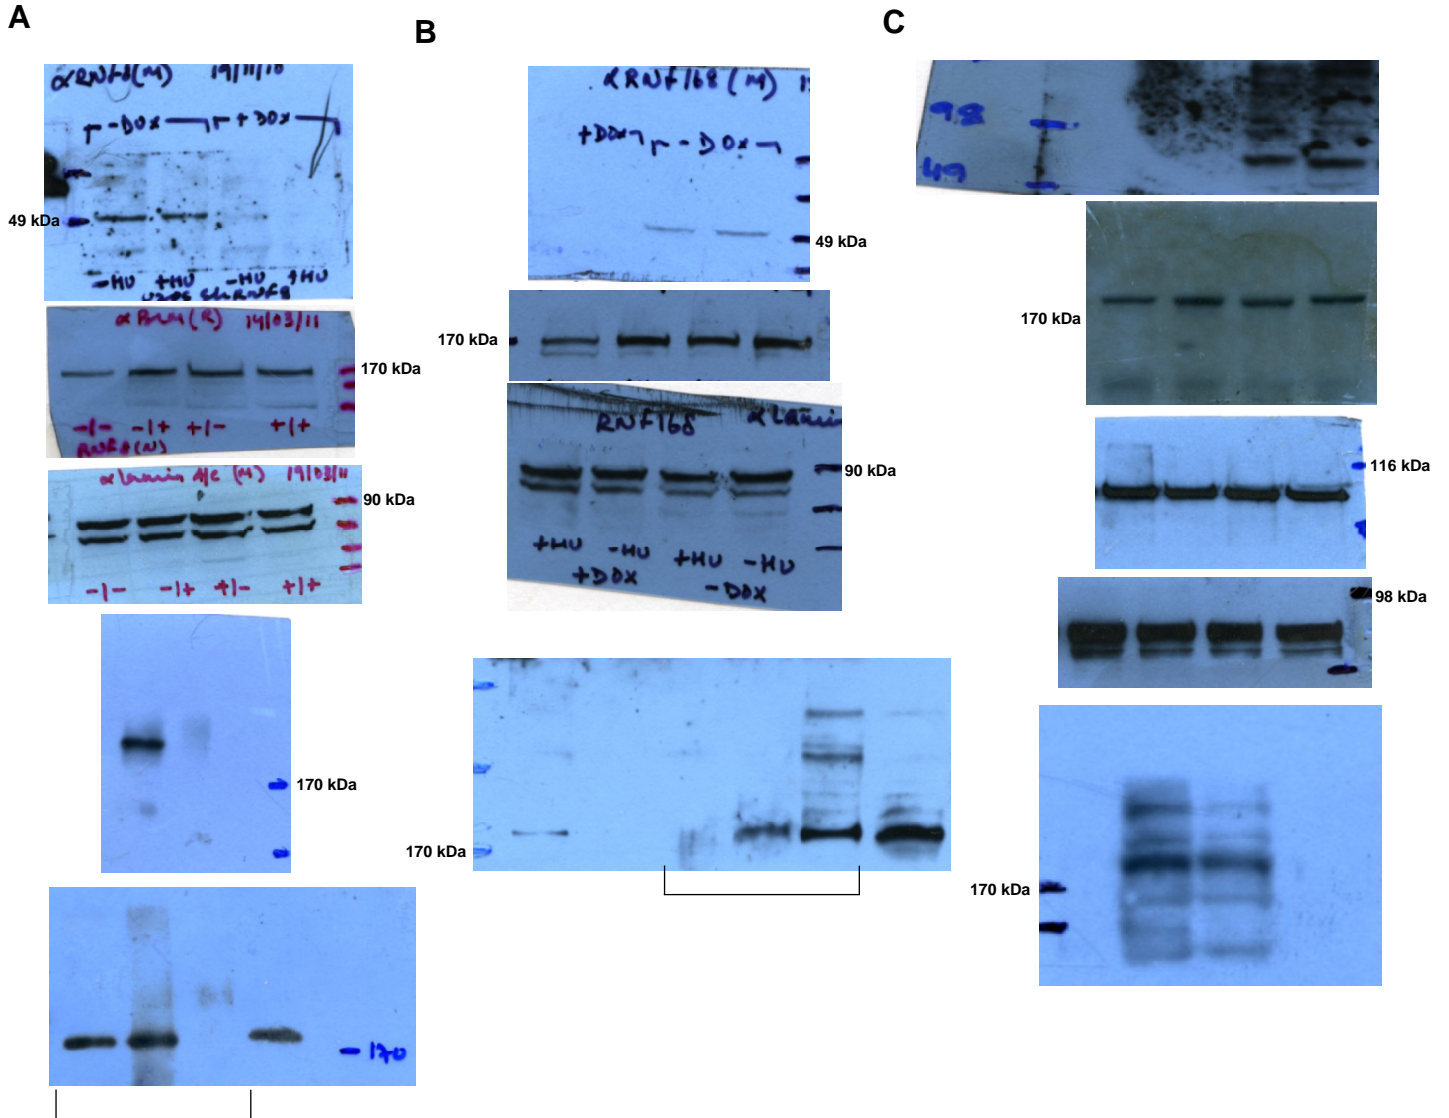

Supplement: emboj2013117df3.pdf [file emboj2013117df3.pdf]

Source file Figure 4  
Tikoo et al.

A

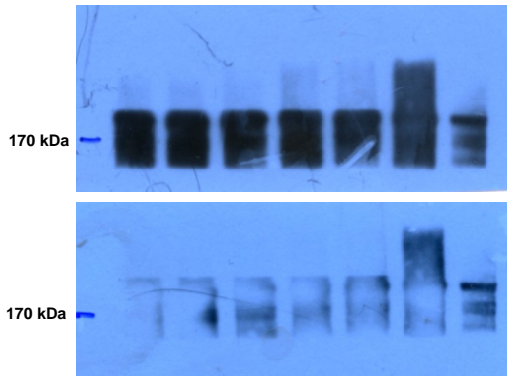

B

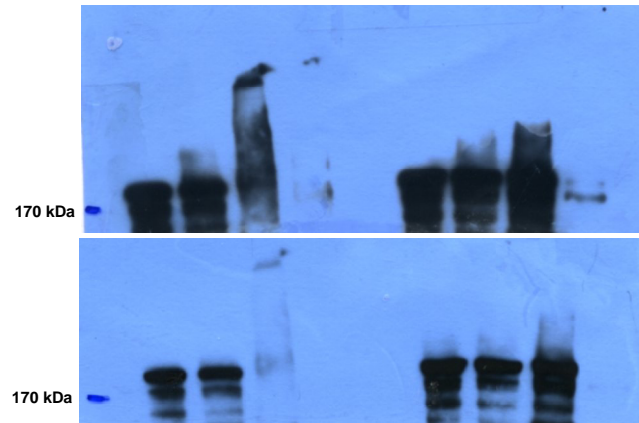

C

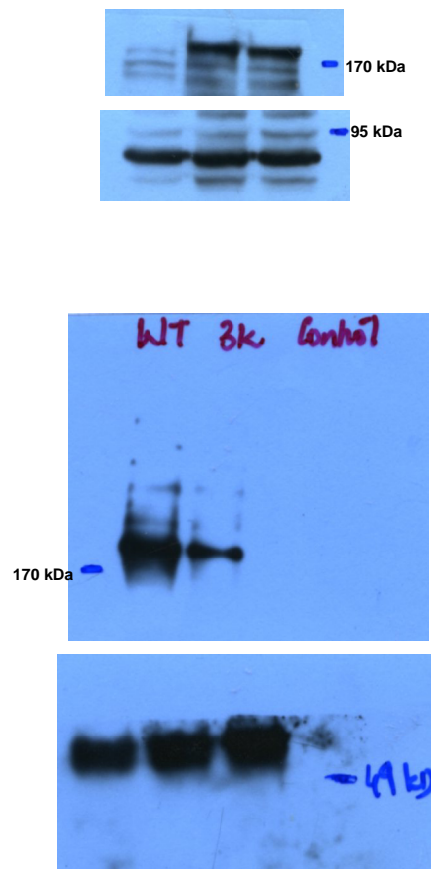

Supplement: emboj2013117df4.pdf [file emboj2013117df4.pdf]

A

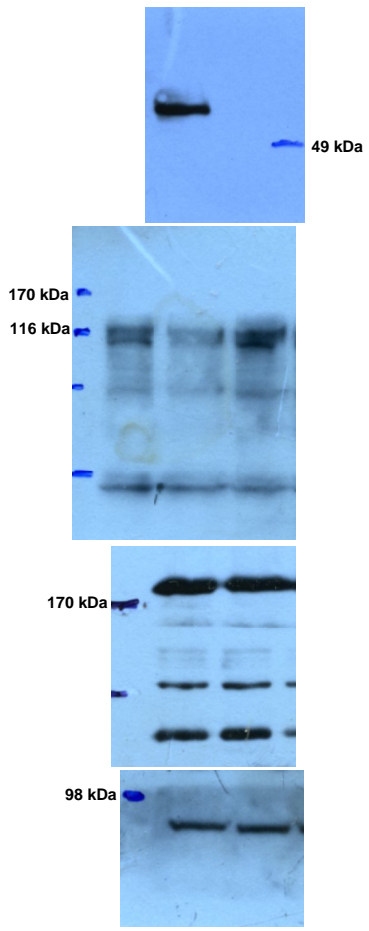

C

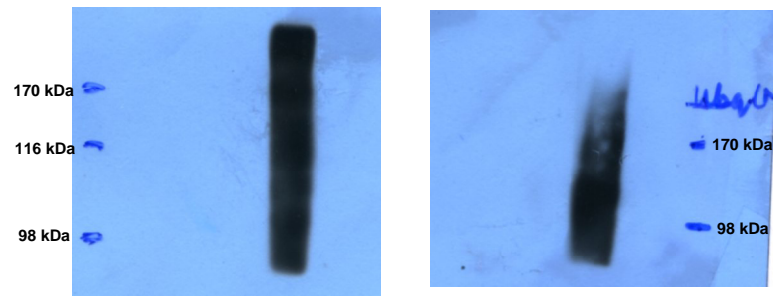

Supplement: emboj2013117df5.pdf [file emboj2013117df5.pdf]

Source file Figure 6A, 6B, 6D, 6E  
Tikoo et al.

**A**

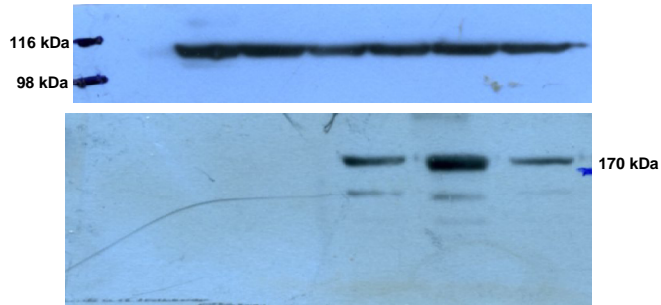

**B**

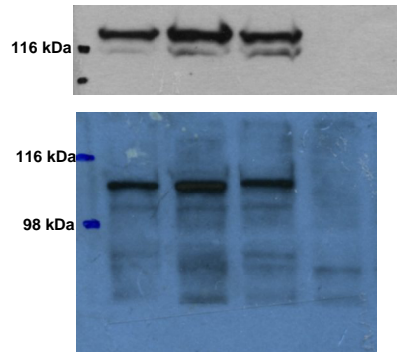

**D**

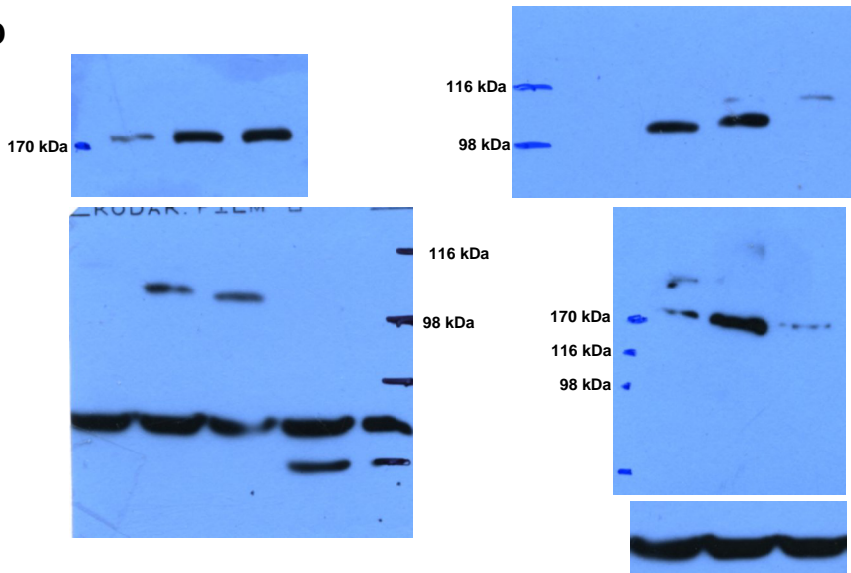

**E**

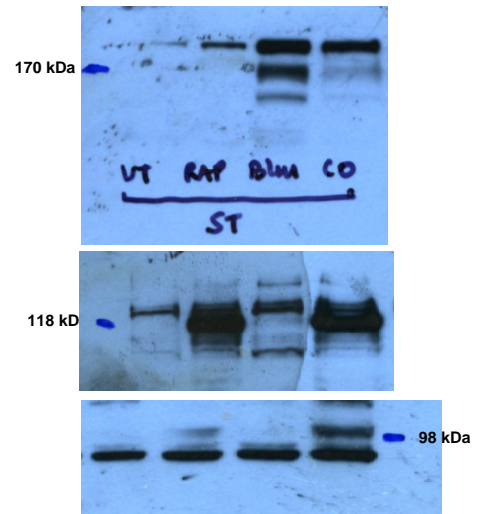

F

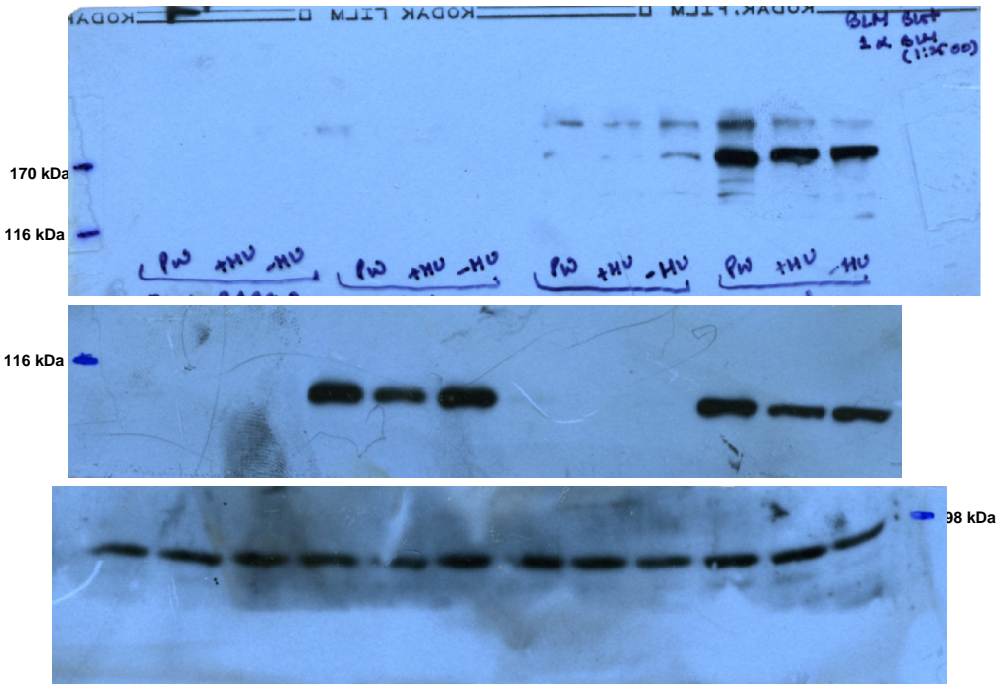

G

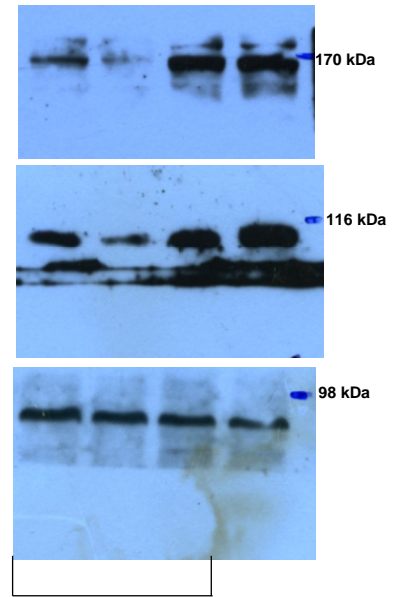

H

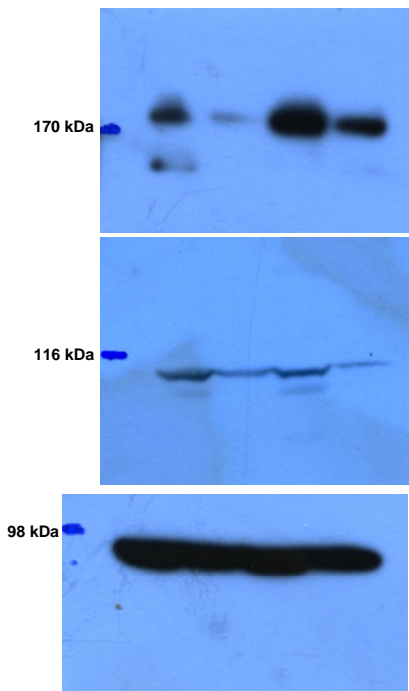

I

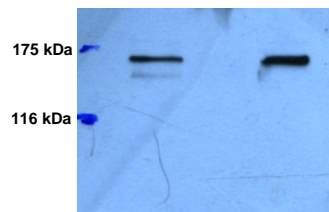

J

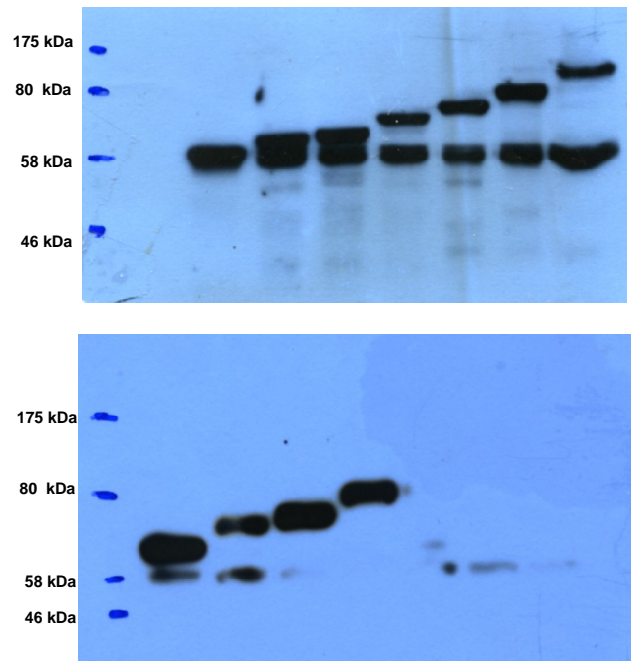

Supplement: emboj2013117df6.pdf [file emboj2013117df6.pdf]

Source file Figure 7  
Tikoo et al.

A

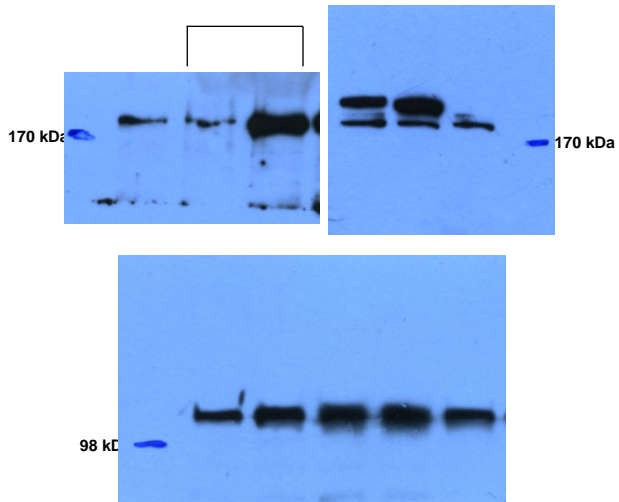

B

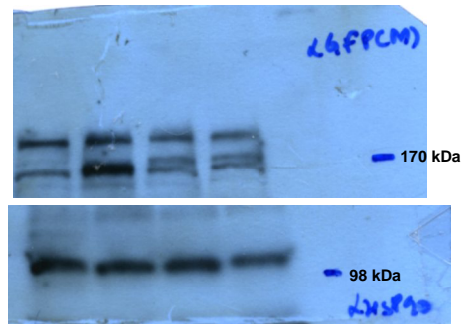

Supplement: emboj2013117df7.pdf [file emboj2013117df7.pdf]

Source file Figure S1  
Tikoo et al.

A

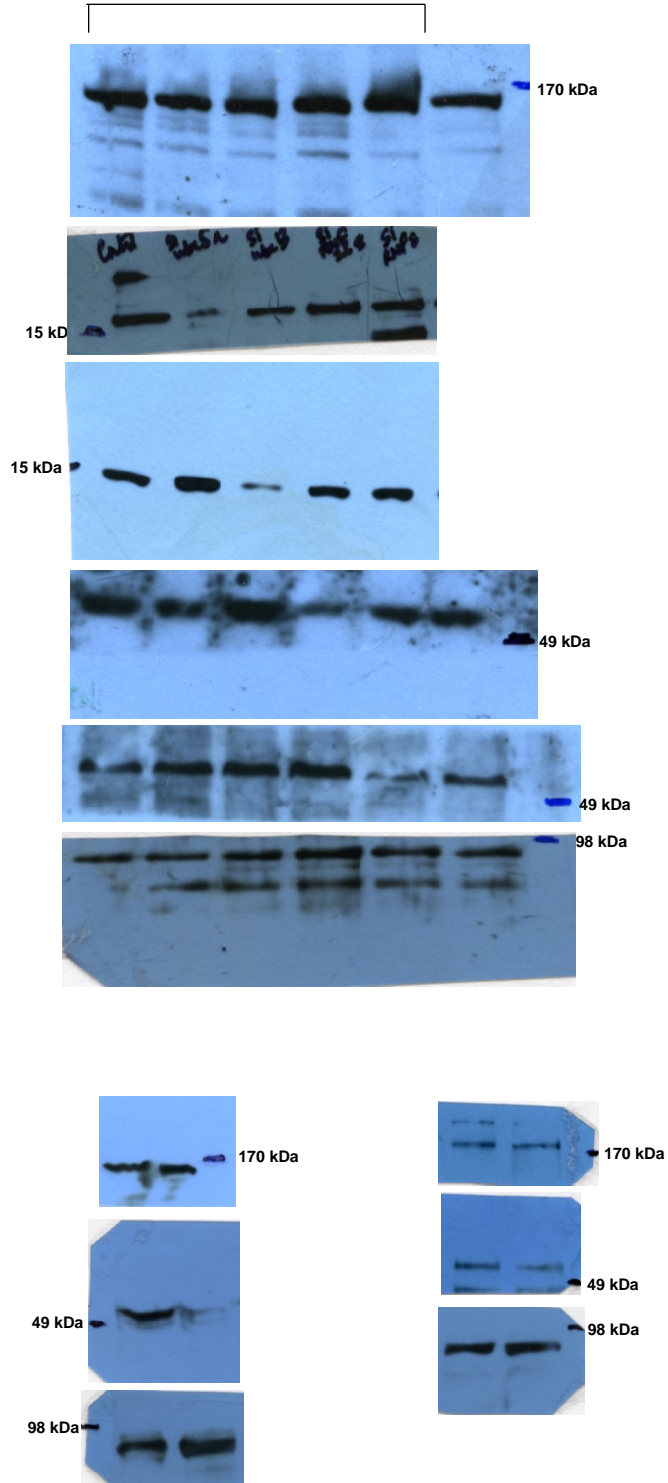

Supplement: emboj2013117dfs1.pdf [file emboj2013117dfs1.pdf]

Source file Figure S2  
Tikoo et al.

B

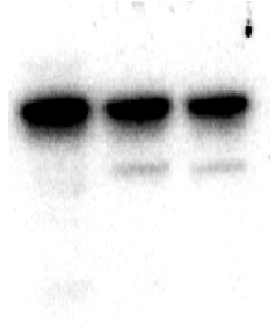

C

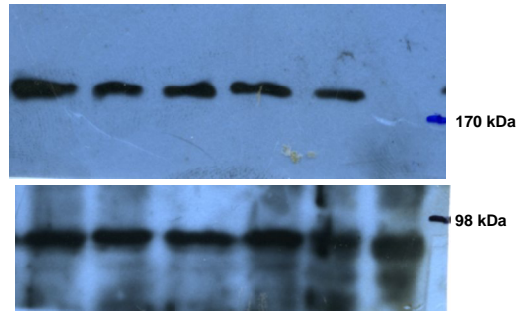

E

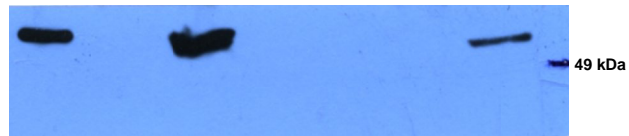

Supplement: emboj2013117dfs2.pdf [file emboj2013117dfs2.pdf]
